# Supplementary material for: Chimeric VLPs Bearing VP60 from Two Serotypes of Rabbit Haemorrhagic Disease Virus Are Protective against Both Viruses
Source: MDPI journal article supplement (doi:10.3390/vaccines9091005), 2021-09-09
Supplement: s1 [file s1]

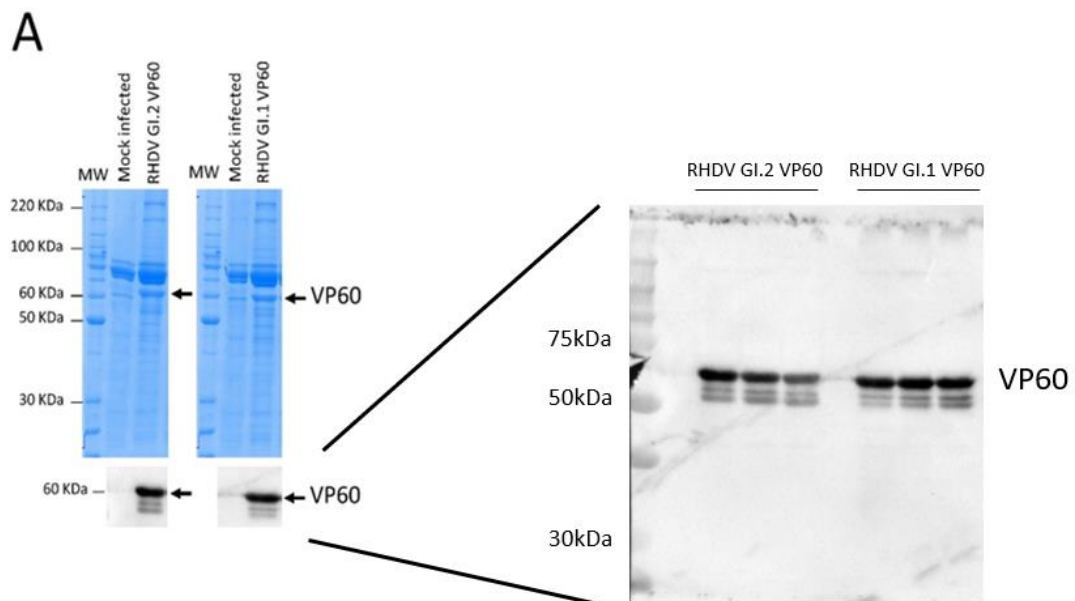

Figure S1. Full uncropped blot of SDS-PAGE gels resolving the extracts from infected pupae with individual baculovirus and stained by Coomassie blue.

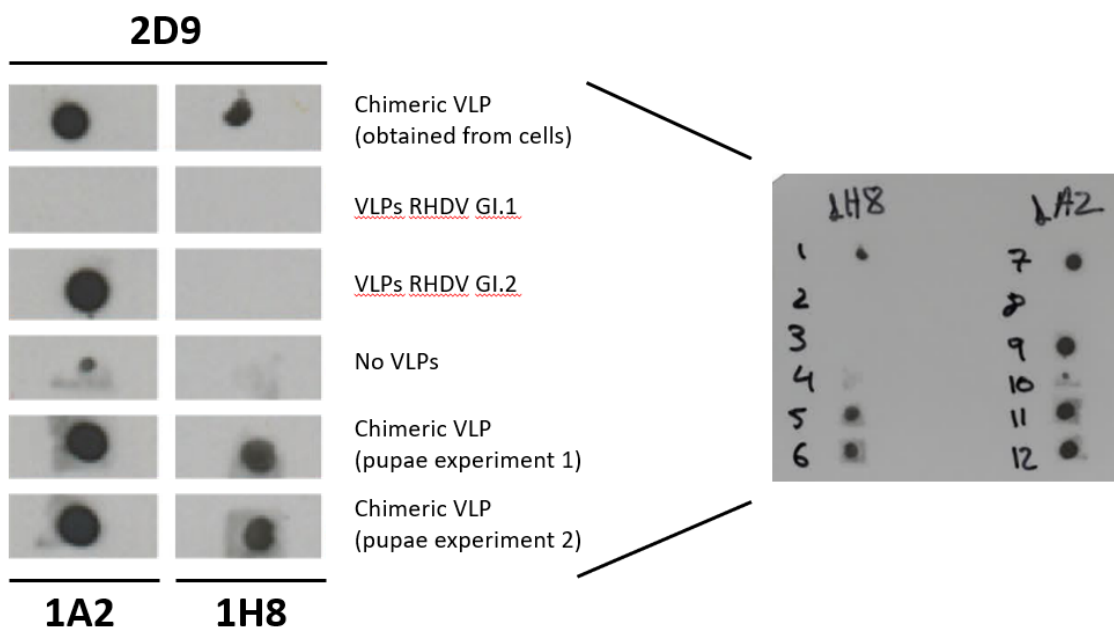

Figure S2. Full uncropped dotblot obtained in the different assays.
